# Supplementary material
Source: Springer Nature journal article supplement (https://www.springermedizin.de/resource/supplementary/12874_2013_1053_MOESM10_ESM.pdf/9433424)

|           |      |      |      |      |
|-----------|------|------|------|------|
| Current   | 24.9 | 20.7 | 16.7 | 13.1 |
| Ex-smoker | 13.9 | 20.8 | 25.8 | 30.1 |
| Never     | 61.3 | 58.5 | 57.5 | 56.8 |

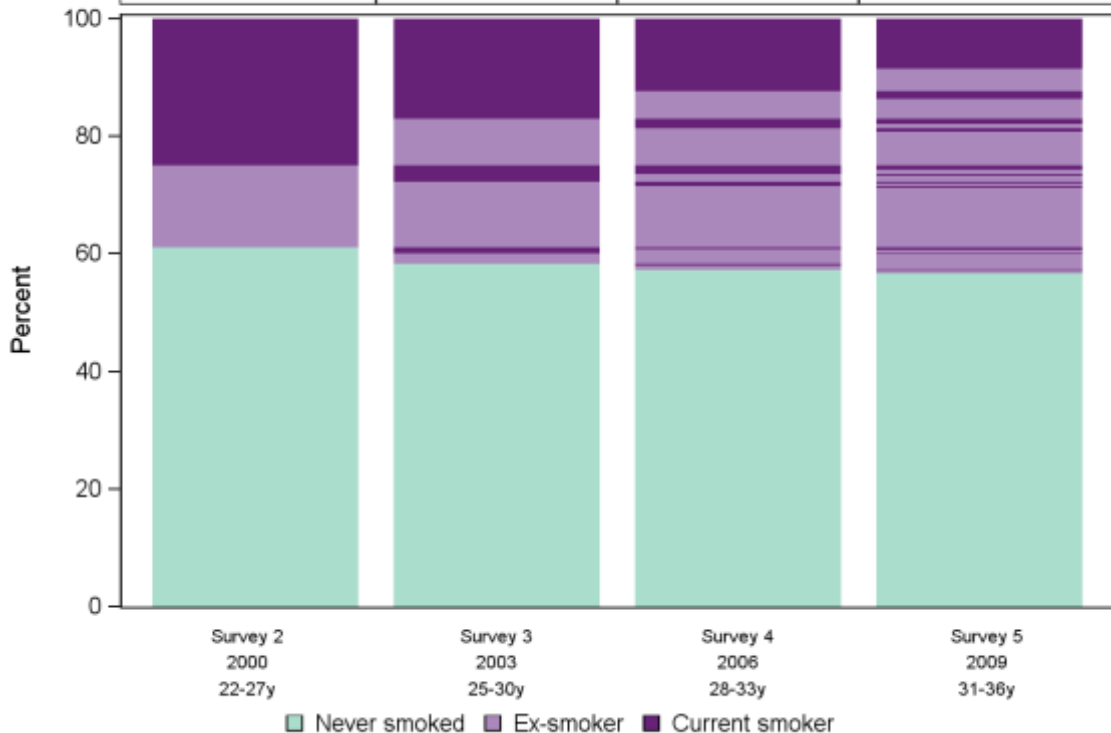

Supplement: MOESM10 [file 9433424]
